# **Impact of COVID-19 on the management and outcomes of ureteric stones in the UK: a multicentre retrospective study**

Matthew H V Byrne<sup>1,2</sup>, Fanourios Georgiades<sup>3,4</sup>, Alexander Light<sup>5</sup>, Catherine E Lovegrove<sup>1,2</sup>, Catherine Dominic<sup>6</sup>, Josephine Rahman<sup>7</sup>, Senthooan Kathiravelupillai<sup>8</sup>, Tobias Klatte<sup>9</sup>, Kasra Saeb-Parsy<sup>4</sup>, Rajeev Kumar<sup>1</sup>, Sarah Howles<sup>1,2</sup>, Grant D Stewart<sup>3,4</sup>, Ben Turney<sup>1,2</sup>, Oliver Wiseman<sup>4</sup> on behalf of the COVID Stones Collaborative\*

## **Affiliations:**

<sup>1</sup>Nuffield Department of Surgical Sciences, University of Oxford, UK

<sup>2</sup>Oxford University Hospitals NHS Foundation Trust, UK

<sup>3</sup>Department of Surgery, University of Cambridge, UK

<sup>4</sup>Cambridge University Hospitals NHS Foundation Trust, UK

<sup>5</sup>Department of Surgery and Cancer, Imperial College London, UK

<sup>6</sup>Barts and the London School of Medicine, Queen Mary University of London, UK

<sup>7</sup>University of Bristol, UK

<sup>8</sup>School of Clinical Medicine, University of Cambridge, UK

<sup>9</sup>Department of Urology, Charité - Universitätsmedizin Berlin, Germany

\*Collaborating authors are listed in Appendix A

## **Corresponding author**

Name: Matthew Byrne

Email address: [matthew.byrne@nds.ox.ac.uk](mailto:matthew.byrne@nds.ox.ac.uk)

Full Institution address: Oxford University Hospitals NHS Foundation Trust, UK

Institution post code: OX3 7LE

Twitter: @mhvbyrne

**Authorship:** MHVB and FG were responsible for conceptualisation. All authors were responsible for writing the first draft and revisions. AL, CD, JR, RK, and Members of the COVID Stone Collaborative were responsible for data collection. MHVB was responsible for data analysis. SH, GDS, BT, and OW were responsible for supervision. BT and OW are the guarantors. All authors have seen and approved the final version.

**Sources of support:** None

**Conflicts of interests:** GDS - educational grants from Pfizer, AstraZeneca and Intuitive Surgical; consultancy fees from Pfizer, Merck, EUSA Pharma and CMR Surgical; Speaker fees from Pfizer; Trustee The Urology Foundation and Kidney Cancer UK; Travel expenses from Pfizer. OJW: consulting fees: Boston Scientific, EMS, Coloplast, Ambu, Astellas. Speaker fees: Education Boston Scientific, EMS, Coloplast, Ambu. Research grants Coloplast, EMSI; Trustee BAUS, Treasurer BAUS. BT: consulting fees: Boston Scientific; Speaker fees: Boston Scientific, Devicare, BJUI (subeditor); Data safety monitoring / advisory board: Boston Scientific.

**Data availability:** The data that support the findings of this study are available from the corresponding author upon reasonable request.

**Ethical Approval:** We followed NHS Health Research Authority guidance and the study did not require ethical approval. Each participating site obtained local audit approval.

**Acknowledgements:** None

**Study type:** Retrospective cohort study

**Running Title:** COVID Stones study

**Key words:** Urolithiasis, ureteric stone, ureteral stone, COVID-19, patient outcomes, management, conservative management, spontaneous stone passage, ESWL, ureteroscopy, nephrostomy

**Number of figures:** 1 (+ 0 supplementary)

**Number of tables:** 3 (+ 1 supplementary)

**Word count:** 2079

# 1 ABSTRACT

2 **Objectives:** To determine if management of ureteric stones in the United Kingdom  
3 changed during the COVID-19 pandemic and whether this affected patient  
4 outcomes.

5  
6 **Patients and methods:** We conducted a multicentre retrospective study of adults  
7 with CT-proven ureteric stone disease at 39 UK hospitals during a pre-pandemic  
8 period (23/3/19 to 22/6/19) and a period during the pandemic (the 3-month period  
9 after the first SARS-CoV-2 case at individual sites). The primary outcome was  
10 success of primary treatment modality, defined as no further treatment required for  
11 the index ureteric stone. Our study protocol was published prior to data collection.

12  
13 **Results:** A total of 3735 patients were included (pre-pandemic=1956 patients;  
14 pandemic=1779 patients). Stone size was similar between groups ( $p>0.05$ ). During  
15 the pandemic, patients had lower hospital admission rates (pre-pandemic=54.0% vs  
16 pandemic=46.5%,  $p<0.001$ ), shorter length of stay (mean=4.1 vs. 3.3 days,  $p=0.02$ ),  
17 and higher rates of use of medical expulsive therapy (17.4% vs. 25.4%,  $p<0.001$ ). In  
18 patients who received interventional management (pre-pandemic  $n=787$  vs.  
19 pandemic  $n=685$ ), rates of ESWL (22.7% vs. 34.1%,  $p<0.001$ ) and nephrostomy  
20 were higher (7.1% vs. 10.5%,  $p=0.03$ ); and rates of ureteroscopy (57.2% vs. 47.5%,  
21  $p<0.001$ ), stent insertion (68.4% vs. 54.6%,  $p<0.001$ ), and general anaesthetic  
22 (92.2% vs. 76.2%,  $p<0.001$ ) were lower.

23  
24 There was no difference in success of primary treatment modality between patient  
25 cohorts (pre-pandemic=73.8% vs. pandemic=76.1%,  $P=0.11$ ), nor when patients

26 were stratified by treatment modality or stone size. Rates of operative complications,  
 27 30-day mortality, and readmission and renal function at 6 months did not differ  
 28 between the data collection periods.

29

30 **Conclusions:** During the COVID-19 pandemic, there were lower admission rates  
 31 and fewer invasive procedures performed. Despite this, there were no differences in  
 32 treatment success or outcomes. Our findings indicate that clinicians can safely adopt  
 33 management strategies developed during the pandemic to treat more patients  
 34 conservatively and in the community.

## 35 INTRODUCTION

36 Nephrolithiasis is a major clinical and economic health challenge. Up to 20% of men  
37 and 10% of women are affected by stone disease <sup>1,2</sup>. It is responsible for over  
38 85,000 hospital episodes in the UK and costs the UK National Health Service (NHS)  
39 an estimated £190-324 million per year <sup>3</sup>.

40

41 The management of ureteric stones can be conservative, as most stones smaller  
42 than 5mm pass spontaneously <sup>4</sup>. However, interventions such as extracorporeal  
43 shockwave lithotripsy (ESWL) or ureteroscopic (URS) laser lithotripsy may be  
44 required. Untreated stone disease can result in refractory pain, sepsis, renal failure,  
45 and death <sup>5</sup>. The UK National Institute for Health and Care Excellence (NICE)  
46 guidelines published in 2019 recommend that adults with ureteric stones measuring  
47 less than 10mm should be treated with ESWL and URS is recommended as a  
48 second line alternative. For ureteric stones measuring between 10 and 20mm, URS  
49 should be offered as first line treatment, and ESWL can be considered if local  
50 facilities will allow stone clearance to be achieved within 4 weeks <sup>6</sup>.

51

52 In March 2020, COVID-19 was declared a pandemic by the World Health  
53 Organisation (WHO), and measures were introduced across the world to mitigate the  
54 spread of infection <sup>7</sup>. There was worldwide disruption to healthcare provision,  
55 including increased pressures on healthcare services and the cancellation of elective  
56 procedures <sup>8</sup>. The multicentre, international COVIDSurg study demonstrated that  
57 perioperative infection with the SARS-CoV-2 virus was associated with an  
58 unadjusted 30-day mortality of 23.8% <sup>9</sup>. In light of this, and as a result of reduced  
59 access to operating theatres, recommendations were made to favour non-operative

60 management strategies <sup>8,10–12</sup>. Furthermore, during the peak of the pandemic in the  
 61 UK, non-COVID-19 related Emergency Department attendances fell dramatically as  
 62 patients delayed or avoided presentation to hospital due to fear of infection <sup>13</sup>.

63

64 The existing body of literature around COVID-19 and endourology discusses  
 65 alterations required of clinical care to accommodate the widespread disruption to  
 66 healthcare services due to COVID-19. However, these articles were written at the  
 67 start of the COVID-19 pandemic and do not discuss whether these suggested  
 68 changes to treatment algorithms manifested during the pandemic or what their  
 69 impact on outcomes were <sup>11,12,14</sup>.

70

71 We hypothesised that during COVID-19 there were delays in patient presentation  
 72 resulting in higher rates of AKI and sepsis and that non-invasive management  
 73 options such as observation, ESWL, and alternatives to general anaesthesia were  
 74 used more frequently, resulting in higher rates of failed index management and  
 75 subsequent change in treatment modality and/or re-presentation to hospital. We  
 76 sought to test this hypothesis by undertaking a multicentre, retrospective study to  
 77 determine how management of ureteric stones changed during the COVID-19  
 78 pandemic in the United Kingdom and define how changes in management affected  
 79 patient outcomes.

## 80 **METHODS**

### 81 **Study design**

82 We conducted a multicentre, retrospective cohort study of the management and  
83 outcomes of patients presenting with ureteric stones before and during the COVID-  
84 19 pandemic at 39 hospitals in the United Kingdom.

85

86 Our protocol was published prior to data collection <sup>15</sup>. We followed principles of the  
87 trainee-led collaborative research model <sup>16</sup>, coordinated by the COVID Stones  
88 Collaborative; and the STROBE (STrengthening the Reporting of OBservational  
89 studies in Epidemiology) guidelines <sup>17</sup> (Appendix B). NHS Health Research Authority  
90 guidance was followed, and each participating site obtained local audit approval.

91

92 Patients aged  $\geq 18$  years with ureteric stone disease confirmed on contrast or non-  
93 contrast computed tomography (CT) imaging were identified via retrospective review  
94 of all abdominal CT scans undertaken during relevant data collection periods.

95 Patients with non-ureteric stone disease were excluded.

### 96 **Data collection**

97 Data was collected during two time periods: a pre-pandemic period from 23/3/19 to  
98 22/6/19; and a period during the pandemic, which was defined as the 3-month period  
99 after the first SARS-CoV-2 case at each individual site. This time point was  
100 approximately equivalent to the start of the first UK lockdown due to Covid-19 on  
101 23/3/20. Data was collected by local collaborators, and entered and stored on the  
102 Research Electronic Data Capture (REDCap) server managed and hosted by the

University of Oxford, UK<sup>18,19</sup>. Data collected included demographics, management and outcomes at 6 months follow-up.

## **Outcomes**

Our primary objective was to assess success of primary treatment modality, defined as no additional treatment required for the index ureteric stone. Our secondary objectives were to assess rates of non-operative management, ESWL, stent insertion, ureteroscopy, and nephrostomy insertion; type of anaesthesia for operative management options; operative complications; hospital admission and length of stay; 30-day and 6-month mortality; readmission, and impact of stone on renal function.

## **Statistical analysis**

Statistical analysis was performed using R (version 4.1.0)<sup>20</sup>. Patients in the pre-pandemic cohort were compared to patients in the pandemic cohort. Two-sided unpaired t-tests, and Chi-squared tests were used to analyse the data. Data is presented as mean  $\pm$  standard deviation (SD) or as raw number and percentage. A p-value  $<0.05$  was deemed significant.



## RESULTS

### Demographics

Data were collected from a total of 3735 patients from 39 centres. In the pre-pandemic period data were entered for 1956 patients, and in pandemic period data was entered for 1779 patients. Baseline patient characteristics were broadly similar (Table 1). Although, there was a significant difference in age between cohorts, the median age group for both cohorts was 50-59 years.

Stone site and size were similar between cohorts (Table 1). Unexpectedly, patients from the pre-pandemic cohort were reported to have significantly higher rates of active infection and acute kidney injury on admission, and fever at any point during index admission. However, mean C-reactive protein, white cell count, positive microbiology cultures (urine or blood), and creatinine were not significantly different (Table 1).

### Management

Overall, patients in the pandemic period had significantly lower rates of admission to hospital (pre-pandemic 54.0% vs. pandemic 46.5%,  $p<0.001$ ) and shorter length of stay in hospital (mean length of stay in days, pre-pandemic=4.1 (SD=8.0) vs. pandemic=3.3 (SD=5.9),  $p=0.02$ ) compared to the pre-pandemic period. The use of alpha blockers was significantly higher during the pandemic (pre-pandemic=17.4% vs. pandemic=25.4%,  $p<0.001$ ). Despite the higher rates of active infection and fever, antibiotic usage was similar between cohorts (Table 2).

## *Interventional management*

There were no differences in rates of interventional management between the cohorts (pre-pandemic, n=787 [40.2%] vs. pandemic, n=685 [38.5%], p=0.30), or ASA grade (p=0.50) and WHO/ECOG Performance status (p=0.21) in patients who received operative management (Table S1). However, there were significantly higher rates of ESWL and nephrostomy insertion, and significantly lower rates of general anaesthetic, ureteroscopy and stent insertion during the pandemic compared to pre-pandemic (Figure 1, Table 2). During the pandemic, planned interventions were delayed due to COVID-19 status in 63 out of 1580 patients (4.0%).

## **Outcomes**

### *30-day outcomes*

The 30-day operative complication rate among those who received operative management was similar between the pre-pandemic and pandemic cohort (Table 2), as was the 30-day mortality rate (any cause) across the whole of each cohort (pre-pandemic=8 of 1793 [0.5%] vs. pandemic=9 of 1640 [0.6%], p=0.85).

### *6-month outcomes*

The success rate of primary treatment (i.e. no further treatment required for the index stone after primary treatment modality) was similar between cohorts (pre-pandemic=73.8% vs. pandemic=76.1%, p=0.11). There was no significant difference in success of primary treatment modality when stratified by treatment modality or stone size.

In patients who did require further intervention, the rates of ESWL, ureteroscopy, retrograde stent insertion, and nephrostomy were similar between each cohort (Table 3).

The mean number of unplanned admissions (pre-pandemic=0.17 (SD=0.52) vs. pandemic=0.18 (SD=0.50),  $p=0.83$ ), mean creatinine (pre-pandemic=87.3 (SD=36.9) vs. pandemic=89.4 (SD=51.9)  $\mu\text{mol/L}$ ,  $p=0.31$ ), and chronic kidney disease stage 1 to 5 (pre-pandemic=17.1% vs. pandemic=17.9%,  $p=0.99$ ) were similar between cohorts. There was a higher mortality rate in the pre-pandemic cohort group (pre-pandemic=40 of 1830 [2.1%] vs. pandemic=18 of 1700 [1.1%],  $p=0.01$ ).

## DISCUSSION

In response to the COVID-19 pandemic, strategies to prioritise and triage patients with urological pathology were developed<sup>12</sup>. These included conservative treatment whenever possible<sup>12</sup>, and use of local-anaesthesia to minimise ventilator use and reduce risk of COVID-19 exposure<sup>11,12,14</sup>. If operative management was deemed necessary, recommendations were made to select patients according to surgical priority using patient factors (symptoms, comorbidities, and renal tract abnormalities) and stone factors (obstruction, infection, and conservative management failure)<sup>11,12</sup>. In cases where there was an infected, obstructed system, multiple sources recommended insertion of a ureteric stent under local anaesthetic as first line treatment, with nephrostomy as second line option<sup>12,14</sup>.

In this study, we demonstrate that the management of ureteric stones changed across the UK during at the onset of the COVID-19 pandemic, with fewer invasive procedures and increased rates of ESWL and medical expulsive management. We also found that rates of nephrostomy were higher, despite lower rates of AKI and active infection.

Other studies have reported a decrease in urological presentations during the COVID-19 pandemic<sup>21–24</sup>. We therefore predicted that during the pandemic patients with ureteric colic would have delayed presenting to hospital and therefore have been a more unwell cohort. However, in our data, rates of AKI and active infection were lower in the pandemic patient cohort suggesting that these patients did not delay their presentation long enough to impact their clinical condition. These findings contrast with other urolithiasis datasets. Castellani et al. compared ureteric stone

disease outcomes of 298 patients prior to the pandemic with 218 patients during the pandemic, reporting reduced admissions and higher rates of infected-obstructed systems, hospitalisation, and intervention during the COVID-19 pandemic<sup>25</sup>.

Furthermore, Flammia et al. found that serum creatinine was significantly higher in 36 patients with urinary stone emergencies during the pandemic compared to 44 patients with urinary stone emergencies prior to the pandemic, which the authors posited was due to delayed presentation<sup>26</sup>. Similarly, Gul et al. demonstrated an increase in creatinine, white cell count, hospital admissions, antibiotic treatment, and emergency nephrostomy insertion in 35 patients with urolithiasis during the pandemic compared to 114 patients with urolithiasis prior to the pandemic<sup>27</sup>.

Our findings are consistent with those reported by Anderson et al. and Nourian et al. who identified no difference in markers of infection or AKI between pre-pandemic and post-pandemic cohorts of patients presenting with urolithiasis<sup>28, 29</sup>. Our study represents the largest cohort to date investigating ureteric stone outcomes during the pandemic, has a multicentre design and had a pre-defined protocol. Thus, we predict our findings are representative of true outcomes in the UK during the COVID-19 pandemic.

Steinberg et al. suggested that we can use the COVID-19 pandemic as an opportunity to reassess ureteric stone management strategies, and establish whether conservative management strategies have been under-used<sup>30</sup>. Our study is the first to evaluate the impact of changes in the management of ureteric stones during the COVID-19 pandemic on patient outcomes at 6 month follow up<sup>26,28,29,31,32</sup>. We demonstrate that increased use of conservative management strategies did not

have a detrimental effect on primary treatment success or patient outcomes at 6-month follow up. Our data supports increased use of less-invasive options recommended by NICE guidance including watchful waiting with medical expulsive therapy and ESWL as first line – there was an approximately 10% shift from URS to ESWL during the pandemic with non-inferior outcomes. Our data also support a reduction in admission rates and earlier discharge. It is unclear whether these changes will revert once the pandemic stabilises and patient backlog is tackled or if practice will change permanently. Evidence such as this should drive a more permanent change to less-invasive management, as the change in practice during the pandemic has shown that this is safe and as effective.

This study is the first of its kind to be conducted across multiple sites with 6-month follow-up. However, the study is limited by its retrospective design, and missing data. Our study was conducted across 39 centres and the number of cases entered by each centre varied considerably. This may be due to differences in local patient populations, however, it may be that not all patients within each time period were captured. This increases the risk of selection bias within our study and therefore no comment can be made on whether there was a change in the number of presentations with ureteric stone disease during each time period.

## 241 CONCLUSIONS

242 As a result of the COVID-19 pandemic patients in the UK with ureteric stones were  
 243 less likely to be treated invasively and more likely to be managed without admission.  
 244 However, this change in practice did not result in inferior outcomes for patients. The  
 245 pandemic has given the urological community an opportunity to re-evaluate  
 246 management of ureteric stones; our findings indicate that a greater proportion of  
 247 ureteric stones can be managed safely and effectively with non-invasive ambulatory  
 248 options.

## REFERENCES

1. Heers H, Turney BW. Trends in urological stone disease: a 5-year update of hospital episode statistics. *BJU Int.* 2016;118(5):785-789.  
doi:10.1111/bju.13520
2. Scales CD, Smith AC, Hanley JM, Saigal CS. Prevalence of Kidney Stones in the United States. *Eur Urol.* 2012;62(1):160-165.  
doi:10.1016/j.eururo.2012.03.052
3. Geraghty RM, Cook P, Walker V, Somani BK. Evaluation of the economic burden of kidney stone disease in the UK: a retrospective cohort study with a mean follow-up of 19 years. *BJU Int.* 2020;125(4):586-594.  
doi:10.1111/bju.14991
4. Shah TT, Gao C, Peters M, et al. Factors associated with spontaneous stone passage in a contemporary cohort of patients presenting with acute ureteric colic: results from the Multi-centre cohort study evaluating the role of Inflammatory Markers In patients presenting with acute ureteric. *BJU Int.* 2019;124(3):504-513. doi:10.1111/bju.14777
5. PEARLE MS, PIERCE HL, MILLER GL, et al. OPTIMAL METHOD OF URGENT DECOMPRESSION OF THE COLLECTING SYSTEM FOR OBSTRUCTION AND INFECTION DUE TO URETERAL CALCULI. *J Urol.* 1998;160(4):1260-1264. doi:10.1016/S0022-5347(01)62511-4
6. NICE guideline NG118: Renal and ureteric stones: Assessment and management.
7. Cucinotta D, Vanelli M. WHO declares COVID-19 a pandemic. *Acta Biomed.* 2020;91(1):157-160. doi:10.23750/abm.v91i1.9397
8. COVIDSurg Collaborative . Elective surgery cancellations due to the COVID-



- 274 19 pandemic: global predictive modelling to inform surgical recovery plans. *Br*  
275 *J Surg.* June 2020. doi:10.1002/bjs.11746
- 276 9. Nepogodiev D, Bhangu A, Glasbey JC, et al. Mortality and pulmonary  
277 complications in patients undergoing surgery with perioperative SARS-CoV-2  
278 infection: an international cohort study. *Lancet.* 2020;396(10243):27-38.  
279 doi:10.1016/S0140-6736(20)31182-X
- 280 10. Royal College of Surgeons of England. Updated Inter-collegiate General  
281 Surgery Guidance on COVID-19. London: Royal College of Surgeons of  
282 England.
- 283 11. Metzler IS, Sorensen MD, Sweet RM, Harper JD. Stone Care Triage During  
284 COVID-19 at the University of Washington. *J Endourol.* 2020;34(5):539-540.  
285 doi:10.1089/end.2020.29080.ism
- 286 12. Proietti S, Gaboardi F, Giusti G. Endourological Stone Management in the Era  
287 of the COVID-19. *Eur Urol.* 2020;78(2):131-133.  
288 doi:10.1016/j.eururo.2020.03.042
- 289 13. Thornton J. Covid-19: A&E visits in England fall by 25% in week after  
290 lockdown. *BMJ.* April 2020:m1401. doi:10.1136/bmj.m1401
- 291 14. Stensland KD, Morgan TM, Moinzadeh A, et al. Considerations in the Triage of  
292 Urologic Surgeries During the COVID-19 Pandemic. *Eur Urol.* 2020;77(6):663-  
293 666. doi:10.1016/j.eururo.2020.03.027
- 294 15. Georgiades F, Byrne MH, Lovegrove CE, et al. The COVID Stones  
295 Collaborative: How has the Management of Ureteric Stones Changed During  
296 and After the COVID-19 Pandemic? Rationale and Study Protocol. *J*  
297 *Endoluminal Endourol.* 2020;3(3):e22-e28. doi:10.22374/JELEU.V3I3.96
- 298 16. Blencowe N, Glasbey J, Heywood N, et al. Recognising contributions to work

299 in research collaboratives: Guidelines for standardising reporting of authorship  
300 in collaborative research. *Int J Surg.* 2018;52:355-360.  
301 doi:10.1016/J.IJSU.2017.12.019

302 17. von Elm E, Altman DG, Egger M, Pocock SJ, Gøtzsche PC, Vandenbroucke  
303 JP. The Strengthening the Reporting of Observational Studies in Epidemiology  
304 (STROBE) statement: guidelines for reporting observational studies. *Lancet.*  
305 2007;370(9596):1453-1457. doi:10.1016/S0140-6736(07)61602-X

306 18. Harris PA, Taylor R, Thielke R, Payne J, Gonzalez N, Conde JG. Research  
307 electronic data capture (REDCap)—A metadata-driven methodology and  
308 workflow process for providing translational research informatics support. *J*  
309 *Biomed Inform.* 2009;42(2):377-381. doi:10.1016/j.jbi.2008.08.010

310 19. Harris PA, Taylor R, Minor BL, et al. The REDCap consortium: Building an  
311 international community of software platform partners. *J Biomed Inform.*  
312 2019;95:103208. doi:10.1016/j.jbi.2019.103208

313 20. R Core Team. R: A language and environment for statistical computing. 2017.  
314 <https://www.r-project.org/>.

315 21. Madanelo M, Ferreira C, Nunes-Carneiro D, et al. The impact of the  
316 coronavirus disease 2019 pandemic on the utilisation of emergency urological  
317 services. *BJU Int.* 2020;126(2):256-258. doi:10.1111/BJU.15109

318 22. Motterle G, Morlacco A, Iafrate M, et al. The impact of COVID-19 pandemic on  
319 urological emergencies: a single-center experience. *World J Urol.* 2021;39(6).  
320 doi:10.1007/S00345-020-03264-2

321 23. Porreca A, Colicchia M, D'Agostino D, et al. Urology in the Time of  
322 Coronavirus: Reduced Access to Urgent and Emergent Urological Care during  
323 the Coronavirus Disease 2019 Outbreak in Italy. *Urol Int.* 2020;104(7-8):631-

324 636. doi:10.1159/000508512

325 24. Korkes F, Smaidi K, Salles MP, Neto ACL, Heilberg IP, Glina S. COVID-19:  
326 The impact on urolithiasis treatment in Brazil. *Int Braz J Urol.* 2022;48(1):101-  
327 109. doi:10.1590/S1677-5538.IBJU.2021.0405

328 25. Castellani D, Ragonese M, Di Rosa M, et al. An Italian multicenter analysis of  
329 emergency admissions and treatment of upper tract urolithiasis during the  
330 lockdown and reopening phases of the COVID-19 pandemic: Are we ready for  
331 a second wave of the outbreak? *Int J Urol.* 2021;28(9):950.  
332 doi:10.1111/IJU.14612

333 26. Flammia S, Salciccia S, Tufano A, Busetto GM, Ricciuti GP, Sciarra A. How  
334 urinary stone emergencies changed in the time of COVID-19? *Urolithiasis.*  
335 2020;48(5):467-469. doi:10.1007/s00240-020-01198-3

336 27. Gul M, Kaynar M, Yildiz M, et al. The Increased Risk of Complicated Ureteral  
337 Stones in the Era of COVID-19 Pandemic. *J Endourol.* 2020;34(8):882-886.  
338 doi:10.1089/end.2020.0658

339 28. Anderson S, McNicholas D, Murphy C, et al. The impact of COVID-19 on acute  
340 urinary stone presentations: a single-centre experience. *Ir J Med Sci.*  
341 2022;191(1):45-49. doi:10.1007/S11845-021-02562-X

342 29. Nourian A, Uppaluri C, Chen M, Ghiraldi EM, Friedlander JI. Comparison of  
343 Management and Outcomes of Symptomatic Urolithiasis During the COVID-19  
344 Pandemic to a Comparative Cohort. *Urology.* 2022.  
345 doi:10.1016/J.UROLOGY.2022.01.019

346 30. Steinberg RL, Johnson BA, Antonelli J, Pearle MS. Urolithiasis in the COVID  
347 Era: An Opportunity to Reassess Management Strategies. *Eur Urol.*  
348 2020;78(6):777. doi:10.1016/J.EURURO.2020.07.019

349 31. Liu Z, Man L. Impacts of the COVID-19 outbreak on visits and treatments for  
350 patients with ureteral stones in a general hospital emergency department. *Urol*  
351 *J.* 2021;88(3):232-236. doi:10.1177/0391560320985659

352 32. Gökce Mİ, Yin S, Sönmez MG, et al. How does the COVID-19 pandemic affect  
353 the preoperative evaluation and anesthesia applied for urinary stones? EULIS  
354 eCORE–IAU multicenter collaborative cohort study. *Urolithiasis.*  
355 2020;48(4):345-351. doi:10.1007/s00240-020-01193-8  
356

# FIGURE CAPTIONS

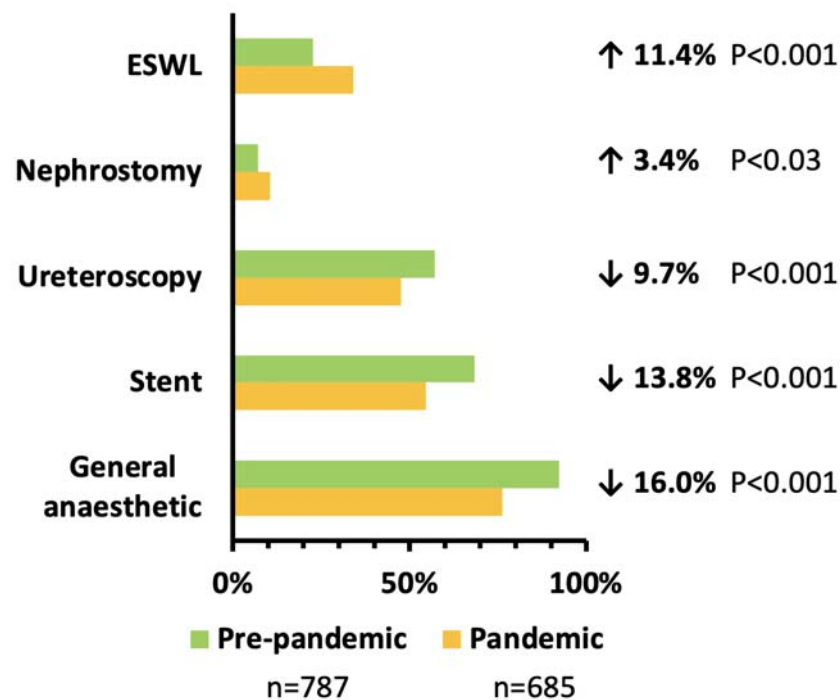

Figure 1: Change in interventional management during the pandemic

## 360 TABLE CAPTIONS

|                                                                            | Pre-pandemic<br>period<br>(N=1956) | Pandemic<br>period<br>(N=1779) | p-<br>value |
|----------------------------------------------------------------------------|------------------------------------|--------------------------------|-------------|
| <b>Age group</b>                                                           |                                    |                                | 0.02        |
| 18-19 years                                                                | 11 (0.6%)                          | 17 (1.0%)                      |             |
| 20-29 years                                                                | 198 (10.1%)                        | 164 (9.2%)                     |             |
| 30-39 years                                                                | 340 (17.4%)                        | 346 (19.4%)                    |             |
| 40-49 years                                                                | 361 (18.5%)                        | 359 (20.2%)                    |             |
| 50-59 years                                                                | 409 (20.9%)                        | 405 (22.8%)                    |             |
| 60-69 years                                                                | 336 (17.2%)                        | 267 (15.0%)                    |             |
| 70-79 years                                                                | 210 (10.7%)                        | 149 (8.4%)                     |             |
| 80+ years                                                                  | 90 (4.6%)                          | 72 (4.1%)                      |             |
| <b>Gender</b>                                                              |                                    |                                | 0.823       |
| Female                                                                     | 576 (29.4%)                        | 517 (29.1%)                    |             |
| Male                                                                       | 1380 (70.6%)                       | 1262 (70.9%)                   |             |
| <b>BMI</b>                                                                 |                                    |                                |             |
| Mean (SD)                                                                  | 28.8 (6.3)                         | 29.6 (7.4)                     | 0.074       |
| Median [IQR]                                                               | 28.0 [24.4-32.1]                   | 28.7 [24.7-32.9]               |             |
| <b>Non-urolological comorbidities</b>                                      |                                    |                                | 0.075       |
| Yes                                                                        | 538 (36.2%)                        | 453 (32.9%)                    |             |
| No                                                                         | 950 (63.8%)                        | 923 (67.1%)                    |             |
| <b>Urological comorbidities</b>                                            |                                    |                                | 0.662       |
| Yes                                                                        | 56 (3.8%)                          | 46 (3.4%)                      |             |
| No                                                                         | 1429 (96.2%)                       | 1309 (96.6%)                   |             |
| <b>Ureteric stone location?</b>                                            |                                    |                                | 0.52        |
| Left                                                                       | 1014 (51.8%)                       | 929 (52.2%)                    |             |
| Right                                                                      | 873 (44.6%)                        | 799 (44.9%)                    |             |
| Bilateral                                                                  | 69 (3.53%)                         | 51 (2.87%)                     |             |
| <b>Maximum stone size (mm)</b>                                             |                                    |                                | 0.687       |
| ≤5                                                                         | 1026 (57.5%)                       | 926 (56.9%)                    |             |
| 6-10                                                                       | 633 (35.5%)                        | 598 (36.8%)                    |             |
| 11-19                                                                      | 108 (6.1%)                         | 85 (5.2%)                      |             |
| ≥20                                                                        | 18 (1.0%)                          | 17 (1.1%)                      |             |
| <b>Active infection at time of presentation</b>                            |                                    |                                | 0.032       |
| Yes                                                                        | 258 (13.2%)                        | 193 (10.8%)                    |             |
| No                                                                         | 1697 (86.8%)                       | 1586 (89.2%)                   |             |
| <b>Fever (Temperature &gt;38 degree C) at any stage in index admission</b> |                                    |                                | 0.031       |
| Yes                                                                        | 151 (9.3%)                         | 107 (7.1%)                     |             |
| No                                                                         | 1482 (90.8%)                       | 1406 (92.9%)                   |             |
| <b>Admission blood tests CRP (mg/L)</b>                                    |                                    |                                | 0.562       |
| Mean (SD)                                                                  | 27.7 (64.6)                        | 26.4 (68.7)                    |             |
| Median [IQR]                                                               | 4.0 [1.0-17.0]                     | 3.0 [1.0-13.0]                 |             |
| <b>Admission blood tests WCC (x10<sup>9</sup>/L)</b>                       |                                    |                                | 0.725       |

|                                                        | Pre-pandemic<br>period<br>(N=1956) | Pandemic<br>period<br>(N=1779) | p-<br>value |
|--------------------------------------------------------|------------------------------------|--------------------------------|-------------|
| Mean (SD)                                              | 11.0 (6.2)                         | 11.0 (4.2)                     |             |
| Median [IQR]                                           | 10.3 [8.1-12.9]                    | 10.7 [8.1-13.1]                |             |
| <b>Positive blood culture</b>                          |                                    |                                | 0.749       |
| Yes                                                    | 51 (38.1%)                         | 41 (41.0%)                     |             |
| No                                                     | 83 (61.9%)                         | 59 (59.0%)                     |             |
| <b>Positive urine culture (&gt;10<sup>5</sup> cfu)</b> |                                    |                                | 0.796       |
| Yes                                                    | 97 (21.8%)                         | 78 (20.9%)                     |             |
| No                                                     | 347 (78.2%)                        | 296 (79.1%)                    |             |
| <b>Admission blood tests Creatinine (umol/L)</b>       |                                    |                                | 0.765       |
| Mean (SD)                                              | 105 (70.8)                         | 106 (75.9)                     |             |
| Median [IQR]                                           | 94.0 [77.0-113.0]                  | 93.0 [78.0-113.0]              |             |
| <b>AKI</b>                                             |                                    |                                | 0.041       |
| Yes                                                    | 340 (21.9%)                        | 290 (18.9%)                    |             |
| No                                                     | 1211 (78.1%)                       | 1245 (81.1%)                   |             |
| <b>AKI Grade (KGIDO)</b>                               |                                    |                                |             |
| Grade 1                                                | 226 (74.1%)                        | 202 (74.8%)                    |             |
| Grade 2                                                | 55 (18.0%)                         | 44 (16.3%)                     |             |
| Grade 3                                                | 24 (7.9%)                          | 24 (8.9%)                      |             |

*Table 1: baseline characteristics between the pre-pandemic patient cohort and the pandemic patient cohort. AKI = acute kidney injury CFU = colony forming units; CRP = C reactive protein; IQR = interquartile range; SD = standard deviation; WCC = white cell count.*

366

|                                  | Pre-pandemic period<br>(N=1956) | Pandemic period<br>(N=1779) | P-value |
|----------------------------------|---------------------------------|-----------------------------|---------|
| <b>Admitted to hospital?</b>     |                                 |                             | <0.001  |
| Yes                              | 1057 (54.0%)                    | 827 (46.5%)                 |         |
| No                               | 899 (46.0%)                     | 952 (53.5%)                 |         |
| <b>Length of stay (days)</b>     |                                 |                             | 0.021   |
| Mean (SD)                        | 4.08 (8.04)                     | 3.29 (5.94)                 |         |
| <b>Alpha blocker</b>             |                                 |                             | <0.001  |
| Yes                              | 316 (17.4%)                     | 414 (25.4%)                 |         |
| No                               | 1501 (82.6%)                    | 1219 (74.6%)                |         |
| <b>Antibiotics</b>               |                                 |                             |         |
| Yes-Oral                         | 171 (8.74%)                     | 148 (8.32%)                 | 0.251   |
| Yes-IV                           | 304 (15.5%)                     | 245 (13.8%)                 |         |
| No                               | 1481 (75.7%)                    | 1386 (77.9%)                |         |
| <b>Interventional management</b> |                                 |                             | 0.295   |
| Yes                              | 787 (40.2%)                     | 685 (38.5%)                 |         |
| No                               | 1169 (59.8%)                    | 1094 (61.5%)                |         |
|                                  | Pre-pandemic period<br>(N=787)  | Pandemic period<br>(N=685)  | P-value |
| <b>Anaesthetic</b>               |                                 |                             | <0.001  |
| General                          | 390 (92.2%)                     | 173 (76.2%)                 |         |
| Non-general                      | 33 (7.80%)                      | 54 (23.8%)                  |         |
| <b>ESWL for index stone</b>      |                                 |                             | <0.001  |
| Yes                              | 179 (22.7%)                     | 233 (34.1%)                 |         |
| No                               | 608 (77.3%)                     | 451 (65.9%)                 |         |



|                                                                           |             |             |        |
|---------------------------------------------------------------------------|-------------|-------------|--------|
| <b>Ureteroscopy for index stone</b>                                       |             |             | <0.001 |
| Yes                                                                       | 450 (57.2%) | 325 (47.5%) |        |
| No                                                                        | 337 (42.8%) | 359 (52.5%) |        |
| <b>Stent insertion for index stone (alone or as part of Ureteroscopy)</b> |             |             | <0.001 |
| Yes                                                                       | 538 (68.4%) | 374 (54.6%) |        |
| No                                                                        | 249 (31.6%) | 311 (45.4%) |        |
| <b>Emergency nephrostomy insertion for index stone</b>                    |             |             | 0.027  |
| Yes                                                                       | 56 (7.1%)   | 72 (10.5%)  |        |
| No                                                                        | 731 (92.9%) | 613 (89.5%) |        |
| <b>Operative complication</b>                                             |             |             | 0.616  |
| Yes                                                                       | 87 (11.5%)  | 68 (10.5%)  |        |
| No                                                                        | 671 (88.5%) | 580 (89.5%) |        |
| 30-day highest Clavien-Dindo grade                                        |             |             |        |
| None                                                                      | 671 (88.5%) | 580 (89.5%) |        |
| I                                                                         | 44 (5.8%)   | 28 (4.3%)   |        |
| II                                                                        | 29 (3.8%)   | 15 (2.3%)   |        |
| III-A                                                                     | 1 (0.1%)    | 8 (1.2%)    |        |
| III-B                                                                     | 9 (1.2%)    | 12 (1.9%)   |        |
| IV-A                                                                      | 2 (0.3%)    | 0 (0.0%)    |        |
| IV-B                                                                      | 1 (0.1%)    | 2 (0.3%)    |        |
| V (death)                                                                 | 1 (0.1%)    | 3 (0.5%)    |        |

---

*Table 2: Management and complications*

369

|                                                              | Pre-pandemic<br>period<br>(N=1956) | Pandemic period<br>(N=1779) | P-value |
|--------------------------------------------------------------|------------------------------------|-----------------------------|---------|
| <b>Primary treatment success</b>                             |                                    |                             | 0.113   |
| Yes                                                          | 1379 (73.8%)                       | 1308 (76.1%)                |         |
| No                                                           | 490 (26.2%)                        | 410 (23.9%)                 |         |
| <b>Unplanned readmission for ureteric stone disease</b>      |                                    |                             | 0.826   |
| Mean (SD)                                                    | 0.173 (0.520)                      | 0.176 (0.500)               |         |
| <b>Creatinine (umol/L)</b>                                   |                                    |                             | 0.305   |
| Mean (SD)                                                    | 87.3 (36.9)                        | 89.4 (51.9)                 |         |
| <b>CKD</b>                                                   |                                    |                             | 0.989   |
| Yes                                                          | 230 (17.2%)                        | 213 (17.1%)                 |         |
| No                                                           | 1111 (82.8%)                       | 1036 (82.9%)                |         |
| <b>Death</b>                                                 |                                    |                             | 0.014   |
| Yes                                                          | 40 (2.14%)                         | 18 (1.05%)                  |         |
| No                                                           | 1830 (97.9%)                       | 1700 (99.0%)                |         |
| <b>Additional interventions</b>                              |                                    |                             |         |
| <b>ESWL</b>                                                  |                                    |                             | 0.231   |
| Yes                                                          | 87 (4.9%)                          | 95 (5.8%)                   |         |
| No                                                           | 1689 (95.1%)                       | 1519 (94.1%)                |         |
| <b>Ureterscopy +/- Laser lithotripsy +/- Stent insertion</b> |                                    |                             | 0.072   |
| Yes                                                          | 358 (19.5%)                        | 288 (17.1%)                 |         |
| No                                                           | 1481 (80.5%)                       | 1400 (82.9%)                |         |
| <b>Stent insertion retrograde</b>                            |                                    |                             | 0.62    |
| Yes                                                          | 84 (4.8%)                          | 69 (4.3%)                   |         |
| No                                                           | 1685 (95.3%)                       | 1524 (95.7%)                |         |

**Nephrostomy insertion** 0.782

|     |              |              |
|-----|--------------|--------------|
| Yes | 17 (1.0%)    | 13 (0.8%)    |
| No  | 1767 (99.0%) | 1602 (99.2%) |

370

371 *Table 3: Outcomes and additional operative management required at 6 months*

372 *follow-up.*

## 373 SUPPLEMENTARY TABLES

|                                                                             | Pre-pandemic period<br>(N=787) | Pandemic period<br>(N=685) | P-value |
|-----------------------------------------------------------------------------|--------------------------------|----------------------------|---------|
| <b>ASA grade</b>                                                            |                                |                            |         |
| 1. A normal healthy patient                                                 | 219 (42.0%)                    | 134 (43.4%)                | 0.498   |
| 2. A patient with mild systemic disease                                     | 199 (38.1%)                    | 125 (40.5%)                |         |
| 3. A patient with severe systemic disease                                   | 89 (17.0%)                     | 45 (14.6%)                 |         |
| 4. A patient with severe systemic disease that is a constant threat to life | 15 (2.87%)                     | 5 (1.62%)                  |         |
| <b>WHO/ECOG Performance status</b>                                          |                                |                            |         |
| Fully active, able to carry on all pre-disease activities                   | 326 (73.1%)                    | 211 (75.9%)                | 0.214   |
| Restricted in physical strenuous activity, able to perform light work       | 87 (19.5%)                     | 39 (14.0%)                 |         |
| Ambulatory and capable of all self-care, unable to work                     | 18 (4.04%)                     | 15 (5.40%)                 |         |
| Capable of limited self-care only                                           | 11 (2.47%)                     | 7 (2.52%)                  |         |
| Completely disabled. Confined to bed or chair                               | 4 (0.897%)                     | 6 (2.16%)                  |         |

374 *Table S1: ASA Grade and WHO/ECOG Performance status*

375
